# Supplementary material
Source: PubMed Central journal article supplement (PMC3315835)
Supplement: NIHMS364331-supplement-1.pdf [file NIHMS364331-supplement-1.pdf]

**Analytical and Bioanalytical Chemistry**

**Electronic Supplementary Material**

**Identification and analysis of stereoselective drug interactions with low-density lipoprotein by  
high-performance affinity chromatography**

Matthew R. Sobansky and David S. Hage

Tables S1 and S2 on the following pages summarize the best-fit parameters that were obtained for each binding model that was examined in this work for *R*- and *S*-propranolol with low density lipoprotein (LDL). The LDL in these studies was immobilized onto a silica support and placed within a column for use in high-performance affinity chromatography.

**Table S1. Binding parameters obtained for *R*-propranolol<sup>a</sup>**

| Binding model                                                   | Temperature (°C) | $m_{L1}$ (mol)                  | $K_{a1}$ (M <sup>-1</sup> ) | $m_{L2}$ (mol)                   | $K_{a2}$ (M <sup>-1</sup> ) | $nK_a$ (M <sup>-1</sup> ) <sup>b</sup> |
|-----------------------------------------------------------------|------------------|---------------------------------|-----------------------------|----------------------------------|-----------------------------|----------------------------------------|
| Single interaction,<br>non-saturable                            | 20               | -                               | -                           | -                                | -                           | $3.5 (\pm 0.1) \times 10^5$            |
|                                                                 | 27               | -                               | -                           | -                                | -                           | $4.3 (\pm 0.2) \times 10^5$            |
|                                                                 | 37               | -                               | -                           | -                                | -                           | $2.1 (\pm 0.1) \times 10^5$            |
| Single groups of<br>saturable sites                             | 20               | $1.4 (\pm 0.4) \times 10^{-7}$  | $5.3 (\pm 1.5) \times 10^3$ | -                                | -                           | -                                      |
|                                                                 | 27               | $6.6 (\pm 1.5) \times 10^{-8}$  | $1.6 (\pm 0.5) \times 10^4$ | -                                | -                           | -                                      |
|                                                                 | 37               | $3.8 (\pm 0.7) \times 10^{-9}$  | $1.2 (\pm 0.3) \times 10^4$ | -                                | -                           | -                                      |
| Two interactions,<br>saturable + non-<br>saturable <sup>c</sup> | 20               | $9.0 (\pm 3.2) \times 10^{-10}$ | $4.3 (\pm 3.4) \times 10^5$ | -                                | -                           | $3.2 (\pm 0.1) \times 10^5$            |
|                                                                 | 27               | $3.0 (\pm 0.9) \times 10^{-9}$  | $4.4 (\pm 2.7) \times 10^5$ | -                                | -                           | $3.5 (\pm 0.2) \times 10^5$            |
|                                                                 | 37               | $7.5 (\pm 1.5) \times 10^{-10}$ | $5.2 (\pm 2.3) \times 10^5$ | -                                | -                           | $1.9 (\pm 0.1) \times 10^5$            |
| Two groups of<br>saturable sites                                | 20               | $9.0 (\pm 9.7) \times 10^{-10}$ | $4.3 (\pm 6.2) \times 10^5$ | $1.3 (\pm 9490) \times 10^{-3}$  | $0.5 (\pm 3491)$            | -                                      |
|                                                                 | 27               | $3.0 (\pm 2.8) \times 10^{-9}$  | $4.4 (\pm 5.2) \times 10^5$ | $7.9 (\pm 87342) \times 10^{-4}$ | $0.8 (\pm 9313)$            | -                                      |
|                                                                 | 37               | $7.5 (\pm 5.7) \times 10^{-10}$ | $5.2 (\pm 4.8) \times 10^5$ | $7.0 (\pm 81917) \times 10^{-4}$ | $0.5 (\pm 5831)$            | -                                      |

---

<sup>a</sup>The numbers in parentheses represent a range of  $\pm 1$  S.D. All of these results were measured in the presence of pH 7.4, 0.067 M potassium phosphate buffer.

<sup>b</sup>The value for  $nK_a$  for a non-saturable interaction was obtained by dividing the best-fit result for  $m_L K_a$  by the estimated moles of LDL. This latter value was obtained by using the protein content of the LDL support, a typical protein content for LDL of 25% ( $w/w$ ), and an average molar mass for LDL of  $2.3 \times 10^6$  g/mol [17].

<sup>c</sup>The results in bold are for the model that was determined to give the best description of the data.

**Table S2. Binding parameters obtained for S-propranolol with LDL<sup>a</sup>**

| Binding model                                      | Temperature (°C) | $m_{L1}$ (mol)                  | $K_{a1}$ (M <sup>-1</sup> ) | $m_{L2}$ (mol)                      | $K_{a2}$ (M <sup>-1</sup> ) | $nK_a$ (M <sup>-1</sup> ) <sup>b</sup> |
|----------------------------------------------------|------------------|---------------------------------|-----------------------------|-------------------------------------|-----------------------------|----------------------------------------|
| Single interaction,<br>non-saturable <sup>c</sup>  | 20               | -                               | -                           | -                                   | -                           | $3.2 (\pm 0.1) \times 10^5$            |
|                                                    | 27               | -                               | -                           | -                                   | -                           | $2.8 (\pm 0.1) \times 10^5$            |
|                                                    | 37               | -                               | -                           | -                                   | -                           | $2.7 (\pm 0.2) \times 10^5$            |
| Single groups of<br>saturable sites                | 20               | $2.0 (\pm 1.8) \times 10^{-7}$  | $3.2 (\pm 3.1) \times 10^3$ | -                                   | -                           | -                                      |
|                                                    | 27               | $4.6 (\pm 4.5) \times 10^{-7}$  | $1.2 (\pm 1.2) \times 10^3$ | -                                   | -                           | -                                      |
|                                                    | 37               | $2.6 (\pm 2.4) \times 10^{-7}$  | $2.0 (\pm 1.9) \times 10^3$ | -                                   | -                           | -                                      |
| Two interactions,<br>saturable + non-<br>saturable | 20               | $0.1 (\pm 1.3) \times 10^{-5}$  | $0.1 (\pm 2.0) \times 10^5$ | -                                   | -                           | $5.4 (\pm 1294) \times 10^4$           |
|                                                    | 27               | $0.7 (\pm 6.0) \times 10^{-7}$  | $0.6 (\pm 4.6) \times 10^5$ | -                                   | -                           | $2.7 (\pm 0.52) \times 10^5$           |
|                                                    | 37               | $0.1 (\pm 1.6) \times 10^{-7}$  | $0.2 (\pm 2.3) \times 10^5$ | -                                   | -                           | $2.2 (\pm 5.38) \times 10^4$           |
| Two groups of<br>saturable sites                   | 20               | $0.1 (+ 6.3) \times 10^{-5}$    | $0.1 (+ 4.5) \times 10^5$   | $2.0 (\pm 96665940) \times 10^{-4}$ | $0.2 (\pm 6848026)$         | -                                      |
|                                                    | 27               | $4.9 (\pm 2636) \times 10^{-9}$ | $0.1 (\pm 3.3) \times 10^6$ | $8.2 (\pm 3776061) \times 10^{-4}$  | $0.6 (\pm 268838)$          | -                                      |
|                                                    | 37               | $6.7 (\pm 2398) \times 10^{-9}$ | $0.1 (\pm 2.4) \times 10^6$ | $7.6 (\pm 4477418) \times 10^{-4}$  | $0.6 (\pm 318741)$          | -                                      |

---

<sup>a</sup>The numbers in parentheses represent a range of  $\pm 1$  S.D. All of these results were measured in the presence of pH 7.4, 0.067 M potassium phosphate buffer.

<sup>b</sup>The value for  $nK_a$  for a non-saturable interaction was obtained by dividing the best-fit result for  $m_L K_a$  by the estimated moles of LDL. This latter value was obtained by using the measured protein content of the LDL support, a typical protein content for LDL of 25% ( $w/w$ ), and an average molar mass for LDL of  $2.3 \times 10^6$  g/mol [17].

<sup>c</sup>The results in bold are for the model that was determined to give the best description of the data.
